# Supplementary material for: Microscale purification in support of high-throughput medicinal chemistry
Source: Royal Society of Chemistry journal article supplement (doi:10.1039/d1cc03791a), 2021-01-01
Supplement: d1cc03791a1.xlsx [file d1cc03791a1.xlsx]

## Sheet: Sheet1
10 Component Test Mix for Microscale Evaluation
				Enter desired volume of Test Mix Solution				120	mL			Test mix solution used "as is" on UHPLC-MS systems (0.1mL injection on 2.1. x 30 mm column).
								Theoretical		Actual amounts
				Required Volume of Stock Solution (DMSO)				12	mL	12	mL	Solids were weighed as noted below and transferred to 120mL amber Qorpak bottle. DMSO (12mL) was added to dissolve all components (with 20 seconds sonication). Slight cloudiness observed.
				Required Volume of Diluent DMSO				108	mL	108	mL	DMSO was added to stock solution. Solution appears to be translucent and yellow.
				Trifluoroacetic Acid (TFA) (Stabilizes ASP = 0.65-1uL TFA/mg ASP)				353.16	uL	240.149	uL	Note: 240uL of TFA was added to the diluted stock. Which gives an apparent pH of 3-5. TFA conc is 0.2% (v/v).
Compound Name	Compound #	Structure	Molecular Formula	Conc (mM)	Exact Mass	MW	FW	Mass		Mass		% by weight	Mass in 0.1 uL (mg)	Mass in 3.1 uL (mg)	Mass in 6.3 uL (mg)	Mass in 12.5 uL (mg)	Mass in 25 uL (mg)	Mass in 50 uL (mg)
Metronidazole CAS 443-48-1	1		C6H9N3O3	25	171.1	171.2	171.2	51.36	mg	53.1	mg	4.57561	0.04425	1.38281	2.76562	5.53125	11.0625	22.125
Hydroxybenzotriazole Monohydrate CAS 123333-53-9	2		C6H5N3O	25	135	135.12	153.13	45.939	mg	55	mg	4.73934	0.0458333	1.43229	2.86458	5.72917	11.4583	22.9167
Aspartame CAS 22839-47-0	3		C14H18N2O5	100	294.1	294.3	294.3	353.16	mg	363.6	mg	31.3313	0.303	9.46875	18.9375	37.875	75.75	151.5
Labetalol HCl CAS 32780-64-6	4		C19H24N2O3	25	328.2	328.4	364.9	109.47	mg	109.4	mg	9.42697	0.0911667	2.84896	5.69792	11.3958	22.7917	45.5833
Dipyridamole CAS 58-32-2	5		C24H40N8O4	25	504.3	504.6	504.6	151.38	mg	154.1	mg	13.2788	0.128417	4.01302	8.02604	16.0521	32.1042	64.2083
4-Aminobenzophenone CAS 1137-41-3	6		C13H11NO	25	197.1	197.23	197.23	59.169	mg	60	mg	5.17019	0.05	1.5625	3.125	6.25	12.5	25
Chrysin CAS 480-40-0	7		C15H10O4	25	254.1	254.2	254.2	76.26	mg	81.7	mg	7.04007	0.0680833	2.1276	4.25521	8.51042	17.0208	34.0417
Disperse Yellow 3 CAS 2832-40-8	8		C15H15N3O2	25	269.1	269.3	269.3	80.79	mg	88.5	mg	7.62602	0.07375	2.30469	4.60938	9.21875	18.4375	36.875
Beclomethasone dipropionate CAS 4419-39-0	9		C28H37ClO7	25	520.2	521	521	156.3	mg	158.2	mg	13.6321	0.131833	4.11979	8.23958	16.4792	32.9583	65.9167
Dipentyl phthalate CAS 131-18-0	10		C18H26O4	25	306.2	306.4	306.4	89.9413	uL	90	uL	7.75528	0.075	2.34375	4.6875	9.375	18.75	37.5
												Total (mg)	0.967083	30.2214	60.4427	120.885	241.771	483.542
Reference: Shu Li, Lesline Julien, Peter Tidswell, and Wolfgang Goetzinger. "Enhanced Performance Test Mix for High-Throughput LC/MS Analysis of Pharmaceutical Compounds." Journal of Combinatorial Chemistry, 2006, 8, 6, 820-828.
